# Supplementary material for: Precipitation Behavior during Aging Operations in an Ultrafine-Grained Al–Cu–Mg Alloy Produced by High-Strain-Rate Processing
Source: MDPI journal article supplement (doi:10.3390/ma15238687), 2022-12-06
Supplement: s1 [file s1]

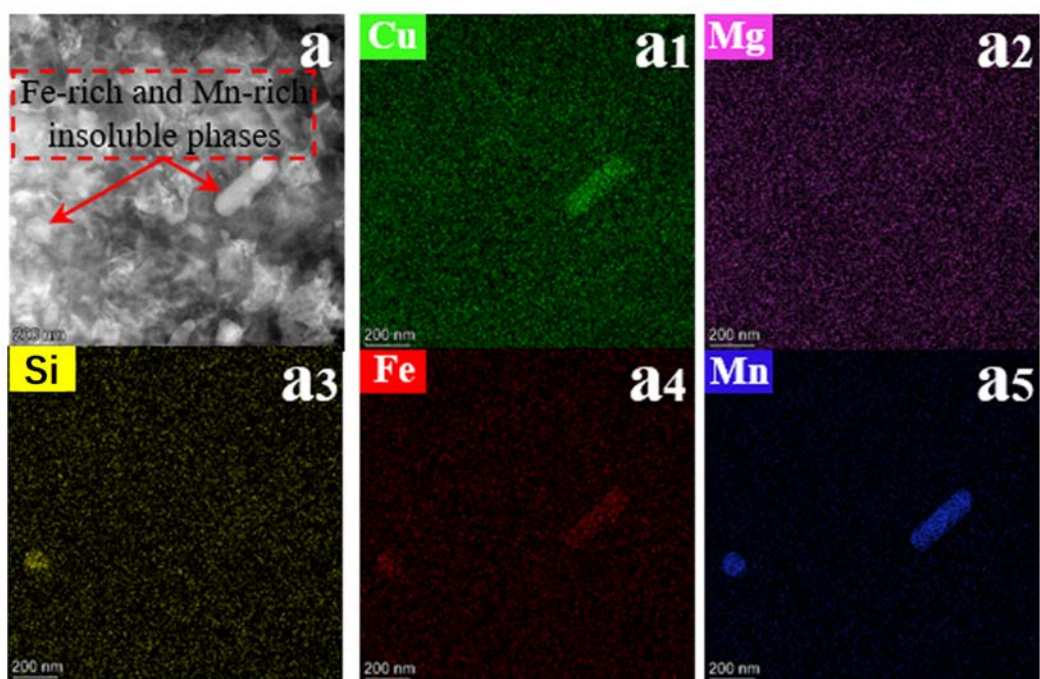

**Supplementary Figure S1.** The solution treated with SMGT alloy: HAADF-STEM image (a) and corresponding EDS elemental maps of copper (a<sub>1</sub>), magnesium (a<sub>2</sub>), silicon (a<sub>3</sub>), iron (a<sub>4</sub>), and manganese (a<sub>5</sub>).
